# Supplementary material for: A bromine catalysed dimerisation of α,α′-dihalomonopyrrolo-TTF
Source: Royal Society of Chemistry journal article supplement (doi:10.1039/b708191j), 2007-01-01
Supplement: b708191j.pdf [file b708191j.pdf]

# Chemical Communications

## A bromine catalysed dimerisation of $\alpha,\alpha'$ -dihalomonopyrrolo-TTF

Hemant Gopee, Bo M. Petersen, Andrew D. Bond and Jan O. Jeppesen

*Department of Physics and Chemistry, University of Southern Denmark,  
Campusvej 55, DK-5230, Odense M, Denmark*

**ELECTRONIC SUPPLEMENTARY INFORMATION**

(7 Pages)

# CONTENT

|                                                                                                                                                                           |          |
|---------------------------------------------------------------------------------------------------------------------------------------------------------------------------|----------|
| <b>Experimental Details</b> .....                                                                                                                                         | <b>3</b> |
| <b>5-Tosyl-4,6-dibromo-2-(4,5-bis(pentylthio)-1,3-dithiole-2-ylidene)-1,3-dithiolo[4,5-c]pyrrole (2a)</b> .....                                                           | <b>3</b> |
| <b>5-Tosyl-4,6-diiodo-2-(4,5-bis(pentylthio)-1,3-dithiole-2-ylidene)-1,3-dithiolo[4,5-c]pyrrole (2b)</b><br>.....                                                         | <b>4</b> |
| <b>5-Methyl-4,6-dibromo-2-(4,5-bis(pentylthio)-1,3-dithiole-2-ylidene)-1,3-dithiolo[4,5-c]pyrrole (3a)</b> .....                                                          | <b>4</b> |
| <b>5-Methyl-4,6-diiodo-2-(4,5-bis(pentylthio)-1,3-dithiole-2-ylidene)-1,3-dithiolo[4,5-c]pyrrole (3b)</b> .....                                                           | <b>5</b> |
| <b>1,3,8,10-Tetrabromo-5,6-dihydro-2,9-dimethyl-5,6-bis(4,5-bis(pentylthio)-1,3-dithiole-2-ylidene)-pyrrolo[3',4'-8,9]-1,2,5,8-tetrathiacino[3,4-c]pyrrole (4a)</b> ..... | <b>5</b> |
| <b>1,3,8,10-Tetraiodo-5,6-dihydro-2,9-dimethyl-5,6-bis(4,5-bis(pentylthio)-1,3-dithiole-2-ylidene)-pyrrolo[3',4'-8,9]-1,2,5,8-tetrathiacino[3,4-c]pyrrole (4b)</b> .....  | <b>6</b> |
| <b>Alternative Mechanism for Dimer Formation</b> .....                                                                                                                    | <b>6</b> |
| <b>Reference</b> .....                                                                                                                                                    | <b>7</b> |

## Experimental Details

CH<sub>2</sub>Cl<sub>2</sub> was distilled before use and THF was distilled from Na/Ph<sub>2</sub>CO before use. Compound 1 was synthesized according to the literature procedure.<sup>1</sup> Other chemicals and solvents were used as received. Column chromatography was performed with silica gel 230-400 mesh from Merck. Melting points are uncorrected. <sup>1</sup>H NMR and <sup>13</sup>C NMR spectra were recorded on Varian Gemini 300 MHz at room temperature. Undeuterated solvent residues were used as internal standard. FT-MALDI-MS and HiRes-FT-MALDI-MS spectra were recorded on Ionspec 4.7 Tesla ultima Fourier Transform mass spectrometer using 2,5-dihydroxybenzoic acid (DHB) as matrix, while MALDI-TOF-MS spectra were recorded on a Kratos Kompact MALDI-TOF instrument using a DHB matrix. Cyclic voltammetry and differential pulse voltammetry were carried out in a 1:1 mixture of THF and MeCN using an ECO chemie PGSTAT10 potentiostat with a Pt working electrode, a Pt counter electrode, a Ag/AgNO<sub>3</sub> reference electrode, and Bu<sub>4</sub>NPF<sub>6</sub> (0.1 M) as the supporting electrolyte. Elemental analyses were performed by Atlantic Microlab, Inc., Georgia.

### 5-Tosyl-4,6-dibromo-2-(4,5-bis(pentylthio)-1,3-dithiole-2-ylidene)-1,3-dithiolo[4,5-c]pyrrole (2a)

Compound 1 (1.00 g, 1.66 mmol) was dissolved in anhydrous THF (50 mL) and stirred in an atmosphere of argon. The mixture was cooled to -78 °C and LDA (3.0 mL of a 1.66 M solution, 5.0 mmol) was added, whereupon the reaction mixture was stirred at -78 °C for 30 min. CNBr (0.71 g, 6.65 mmol) was added in one portion resulting in a colour change from yellow to orange. Stirring was continued for 2.5 h at -78 °C. The reaction mixture was allowed to warm to room temperature and stirred for a further 20 min, before H<sub>2</sub>O (100 mL) was added. The resulting mixture was extracted with CH<sub>2</sub>Cl<sub>2</sub> (3 × 100 mL) and the combined extracts were dried (MgSO<sub>4</sub>). The solvent was removed and the crude product purified by column chromatography (500 mL SiO<sub>2</sub>, Ø = 6 cm, eluent: CH<sub>2</sub>Cl<sub>2</sub>-petroleum ether, 3:7) to give the title compound 2a (0.88 g, 70%) as a yellow solid. Mp. 92.2–92.8 °C. Anal. Found: C, 39.81; H, 4.00; N, 1.93; S, 29.29. Calc. for C<sub>25</sub>H<sub>29</sub>Br<sub>2</sub>NO<sub>2</sub>S<sub>7</sub>: C, 39.52; H, 3.85; N, 1.84; S, 29.54. <sup>1</sup>H NMR (300 MHz/CDCl<sub>3</sub>/TMS) δ 0.89 (t, 6H, *J* = 7.1 Hz, CH<sub>2</sub>CH<sub>3</sub>), 1.25–1.43 (m, 8H, CH<sub>2</sub>CH<sub>2</sub>CH<sub>3</sub>), 1.59 (quintet, 4H, *J* = 7.2 Hz, SCH<sub>2</sub>CH<sub>2</sub>), 2.44 (s, 3H, Ts-CH<sub>3</sub>), 2.79 (t, 4H, *J* = 7.2 Hz, SCH<sub>2</sub>), 7.33 (d, 2H, *J* = 8.2 Hz, Ts-H), 7.84 (d, 2H, *J* = 8.2 Hz, Ts-H). MS (FT-MALDI) *m/z* 679 ([*M* + H - Br]<sup>+</sup>), 603 ([*M* + H - Ts]<sup>+</sup>).

**5-Tosyl-4,6-diiodo-2-(4,5-bis(pentylthio)-1,3-dithiole-2-ylidene)-  
1,3-dithiolo[4,5-c]pyrrole (2b)**

Compound **1** (1.00 g, 1.66 mmol) was dissolved in anhydrous THF (50 mL) in an atmosphere of nitrogen. The mixture was cooled to  $-78\text{ }^{\circ}\text{C}$  and LDA (3.37 mL of a 1.48 M solution, 5.00 mmol) was added, whereupon the mixture was stirred at  $-78\text{ }^{\circ}\text{C}$  for 30 min. Iodine (2.53 g, 9.98 mmol) was added in one portion. Stirring was continued for a further 2 h at  $-78\text{ }^{\circ}\text{C}$  and then at room temperature for 1 h.  $\text{H}_2\text{O}$  (100 mL) was added followed by addition of an aqueous solution of  $\text{Na}_2\text{SO}_3$  (50 mL, 20%) and the mixture was extracted with  $\text{CH}_2\text{Cl}_2$  ( $3 \times 100$  mL). The combined extracts were dried ( $\text{MgSO}_4$ ) and the solvent removed. The crude product was purified by column chromatography (500 mL  $\text{SiO}_2$ ,  $\text{O} = 6$  cm, eluent:  $\text{CH}_2\text{Cl}_2$ –petroleum ether 1:1) to give **2b** (1.21 g, 85%) as an orange solid. Mp.  $107.4\text{--}107.5\text{ }^{\circ}\text{C}$ . Anal. Found: C, 35.47; H, 3.32; N, 1.73; S, 26.41. Calc. for  $\text{C}_{25}\text{H}_{29}\text{I}_2\text{NO}_2\text{S}_7$ : C, 35.17; H, 3.42; N, 1.64; S, 26.29.  $^1\text{H}$  NMR (300 MHz/ $\text{CDCl}_3$ /TMS)  $\delta$  0.89 (t, 6H,  $J = 7.2$  Hz,  $\text{CH}_2\text{CH}_3$ ), 1.25–1.43(m, 8H  $\text{CH}_2\text{CH}_2\text{CH}_3$ ), 1.61 (quintet, 4H,  $J = 7.3$  Hz,  $\text{SCH}_2\text{CH}_2$ ), 2.43 (s, 3H, Ts- $\text{CH}_3$ ), 2.79 (t, 4H,  $J = 7.3$  Hz,  $\text{SCH}_2$ ), 7.32 (d, 2H  $J = 8.6$  Hz, Ts-H), 7.85 (d, 2H,  $J = 8.6$  Hz, Ts-H).  $^{13}\text{C}$  NMR (75 MHz/ $\text{CDCl}_3$ /TMS)  $\delta$  14.1, 22.3, 29.5, 30.8, 36.5, 55.4, 108.2, 117.6, 127.7, 128.0, 130.2, 134.7, 139.4, 146.1 (one line is missing/overlapping). MS (HiRes-FT-MALDI)  $m/z$  852.8368 ( $M^{+}$ ). Calc. for  $\text{C}_{25}\text{H}_{29}\text{I}_2\text{NO}_2\text{S}_7^{+}$  852.8327.

**5-Methyl-4,6-dibromo-2-(4,5-bis(pentylthio)-1,3-dithiole-2-ylidene)-  
1,3-dithiolo[4,5-c]pyrrole (3a)**

Compound **2a** (1.50 g, 1.97 mmol) and MeI (2.80 g, 19 mmol) were dissolved in anhydrous THF (50 mL) under an atmosphere of nitrogen and stirred at room temperature. NaOMe (7.0 mL of a 25% solution in MeOH, 21 mmol) was added in one portion and the reaction mixture was stirred for 30 min.  $\text{H}_2\text{O}$  (100 mL) was added and the mixture was extracted with  $\text{CH}_2\text{Cl}_2$  ( $3 \times 100$  mL). The combined extracts were dried ( $\text{MgSO}_4$ ) and concentrated. The crude product was purified by column chromatography (500 mL  $\text{SiO}_2$ ,  $\text{O} = 6$  cm, eluent:  $\text{CH}_2\text{Cl}_2$ –petroleum ether, 3:7) to give **3a** (0.81 g, 67%) as an unstable orange powder.  $^1\text{H}$  NMR (300 MHz/ $\text{CDCl}_3$ /TMS)  $\delta$  0.90 (t, 6H,  $J = 7.0$  Hz,  $\text{CH}_2\text{CH}_3$ ), 1.20–1.43 (m, 8H,  $\text{CH}_2\text{CH}_2\text{CH}_3$ ), 1.63 (quintet, 4H,  $J = 7.3$  Hz,  $\text{SCH}_2\text{CH}_2$ ), 2.81 (t, 4H,  $J = 7.3$  Hz,  $\text{SCH}_2$ ), 3.53 (s, 3H,  $\text{NCH}_3$ ).  $^{13}\text{C}$  NMR (75 MHz/ $\text{CDCl}_3$ /TMS)  $\delta$  14.1, 22.3, 29.6, 30.8, 35.2, 36.4, 93.6, 114.4, 115.0, 120.3, 127.7. MS (HiRes-FT-MALDI)  $m/z$

616.8716 ( $M^+$ ). Calc. for  $C_{19}H_{25}Br_2NS_6^{++}$  616.8673. Crystals suitable for X-ray crystallography were prepared as described in the experimental procedure for compound **4a**.

### **5-Methyl-4,6-diiodo-2-(4,5-bis(pentylthio)-1,3-dithiole-2-ylidene)-1,3-dithiolo[4,5-c]pyrrole (3b)**

Compound **2b** (0.80 g, 0.94 mmol) and MeI (2.66 g, 18.80 mmol) were dissolved in anhydrous THF (30 mL) under an atmosphere of nitrogen and stirred at room temperature. NaOMe (3.0 mL of a 25% solution in MeOH, 9.38 mmol) was added in one portion and the reaction mixture was stirred for 30 min.  $H_2O$  (100 mL) was added and the mixture was extracted with  $CH_2Cl_2$  ( $3 \times 100$  mL). The combined extracts were dried ( $MgSO_4$ ) and concentrated. The crude product was purified by column chromatography (500 mL  $SiO_2$ ,  $\varnothing = 6$  cm, eluent:  $CH_2Cl_2$ –petroleum ether, 3:7) to give **3b** (0.58 g, 87%) as a yellow solid. Mp. 107.8–108.4 °C. Anal. Found: C, 32.32; H, 3.52; N, 1.89; S, 27.07. Calc. for  $C_{19}H_{25}I_2NS_6$ : C, 31.98; H, 3.53; N, 1.96; S, 26.96.  $^1H$  NMR ( $CDCl_3/300$  MHz/TMS):  $\delta = 0.91$  (t, 6H,  $J = 7.0$  Hz,  $CH_2CH_3$ ), 1.30–1.44 (m, 8H,  $CH_2CH_2CH_3$ ), 1.64 (quintet, 4H,  $J = 7.3$  Hz,  $SCH_2CH_2$ ), 2.82 (t, 4H,  $J = 7.3$  Hz,  $SCH_2$ ), 3.58 (s, 3H,  $NCH_3$ ). MS (HiRes-FT-MALDI)  $m/z$  712.8422 ( $M^+$ ). Calc for  $C_{19}H_{25}I_2NS_6^{++}$  712.8395. Crystals suitable for X-ray crystallography were grown by slow diffusion of MeOH into a solution of **3b** in  $CH_2Cl_2$ .

### **1,3,8,10-Tetrabromo-5,6-dihydro-2,9-dimethyl-5,6-bis(4,5-bis(pentylthio)-1,3-dithiole-2-ylidene)-pyrrolo[3',4'-8,9]-1,2,5,8-tetrathiacino[3,4-c]pyrrole (4a)**

*Method A.* Compound **3a** (0.50 g, 0.81 mmol) was dissolved in  $CH_2Cl_2$  (1 mL) followed by the addition of MeOH (4 mL) such that compound **3a** started to precipitate. The solution was heated to redissolve the precipitate. The mixture was kept at a temperature of 4 °C for 5 days, whereupon the mixture was filtered affording a small amount of **3a** as yellow crystals suitable for X-ray crystallography. The filtrate (obtained as a dark solution) was concentrated and the resulting residue was purified by column chromatography (300 mL  $SiO_2$ ,  $\varnothing = 45$  mm, eluent: 1:4  $CH_2Cl_2$ /petroleum ether) to give **4a** (0.25 g, 50%) as an orange-yellow solid.

*Method B.* Compound **3a** (0.50 g, 0.81 mmol) was dissolved in  $CH_2Cl_2$  (10 mL) followed by addition of a solution of  $Br_2$  in  $CH_2Cl_2$  (1 drop, from a solution made by adding 1 drop of  $Br_2$  in 5 mL of  $CH_2Cl_2$ ). The reaction mixture was kept under  $N_2$  at 4 °C for 24 h leaving a dark solution which subsequently was concentrated. The resulting residue was purified by column

chromatography (300 mL SiO<sub>2</sub>, Ø = 45 mm, eluent: 1:4 CH<sub>2</sub>Cl<sub>2</sub>/petroleum ether) to give **4a** (0.34 g, 68%) as an orange-yellow solid. Mp. 104.7–105.8 °C (dec). <sup>1</sup>H NMR (CDCl<sub>3</sub>/300 MHz/TMS) δ 0.92 (t, 6H *J* = 7.4 Hz, CH<sub>2</sub>CH<sub>3</sub>), 0.94 (t, 6H, *J* = 7.4 Hz, CH<sub>2</sub>CH<sub>3</sub>), 1.30–1.46 (m, 16H, CH<sub>2</sub>CH<sub>2</sub>CH<sub>3</sub>), 1.66 (quintet, 8H, *J* = 7.3 Hz, SCH<sub>2</sub>CH<sub>2</sub>), 2.80–2.94 (m, 8H, SCH<sub>2</sub>), 3.67 (s, 6H, NCH<sub>3</sub>). MS (HiRes-FT-MALDI) *m/z* 1233.7320 (*M*<sup>+</sup>). Calc. for C<sub>38</sub>H<sub>50</sub>Br<sub>4</sub>N<sub>2</sub>S<sub>12</sub><sup>+</sup> 1233.7350. Crystals suitable for X-ray crystallography were grown by slow diffusion of MeOH into a solution of **4a** in CH<sub>2</sub>Cl<sub>2</sub>.

### **1,3,8,10-Tetraiodo-5,6-dihydro-2,9-dimethyl-5,6-bis(4,5-bis(pentylthio)-1,3-dithiole-2-ylidene)-pyrrolo[3',4'-8,9]-1,2,5,8-tetrathiacino[3,4-*c*]pyrrole (4b)**

Compound **3b** (0.15 g, 0.21 mmol) was dissolved in CH<sub>2</sub>Cl<sub>2</sub> (1 mL) followed by addition of a solution of Br<sub>2</sub> in CH<sub>2</sub>Cl<sub>2</sub> (1 mL of a 2.03 mM solution of Br<sub>2</sub> in CH<sub>2</sub>Cl<sub>2</sub>, 0.0020 mmol). The reaction mixture was stirred under N<sub>2</sub> for 4.5 h, before an aqueous solution of Na<sub>2</sub>SO<sub>3</sub>·7H<sub>2</sub>O (1.5 g in 3 mL H<sub>2</sub>O) was added. The mixture was poured into CH<sub>2</sub>Cl<sub>2</sub> (50 mL) and separated. The organic phase was dried (MgSO<sub>4</sub>). Evaporation of the solvent gave an oil, which was purified by column chromatography (300 mL SiO<sub>2</sub>, Ø = 45 mm, eluent: 1:4 CH<sub>2</sub>Cl<sub>2</sub>/cyclohexane) to give the title compound **4b** (0.089 g, 59%) as a yellow solid. Mp. 119.9–121.5 °C (dec). <sup>1</sup>H NMR (CDCl<sub>3</sub>/300 MHz/TMS) δ 0.91 (t, 6H, *J* = 7.0 Hz, CH<sub>2</sub>CH<sub>3</sub>), 0.92 (t, 6H, *J* = 7.1 Hz, CH<sub>2</sub>CH<sub>3</sub>) 1.28–1.46 (m, 16 H, CH<sub>2</sub>CH<sub>2</sub>CH<sub>3</sub>), 1.55–1.76 (m, 8H, SCH<sub>2</sub>CH<sub>2</sub>), 2.72–2.86 (m, 8H, SCH<sub>2</sub>), 3.76 (s, 6H, NCH<sub>3</sub>). (MALDI–TOF) *m/z* (%) 1427 (*M*<sup>+</sup>, 100), 1301 ([*M* + H – I]<sup>+</sup>, 20), 1173 ([*M* + H – 2 × I]<sup>+</sup>, 33). (HiRes-FT-MALDI) *m/z* 1171.9562 ([*M* – 2 × I]<sup>+</sup>). Calc. for C<sub>38</sub>H<sub>50</sub>I<sub>2</sub>N<sub>2</sub>S<sub>12</sub><sup>+</sup> 1171.8690. Crystals suitable for X-ray crystallography were grown by slow diffusion of MeOH into a solution of **4b** in CH<sub>2</sub>Cl<sub>2</sub>.

### **Alternative Mechanism for Dimer Formation**

An alternative mechanism for the dimer formation is depicted in Scheme S1. In the first step, the monomer **3** is oxidised by bromine to generate the radical cation **3**<sup>•+</sup>. Dimerisation of two equivalents of **3**<sup>•+</sup> form the intermediate **7**<sup>2+</sup>, which subsequently rearrange to produce **4**<sup>2+</sup>. Finally, **4**<sup>2+</sup> is reduced by bromide affording the neutral dimer **4** and bromine.

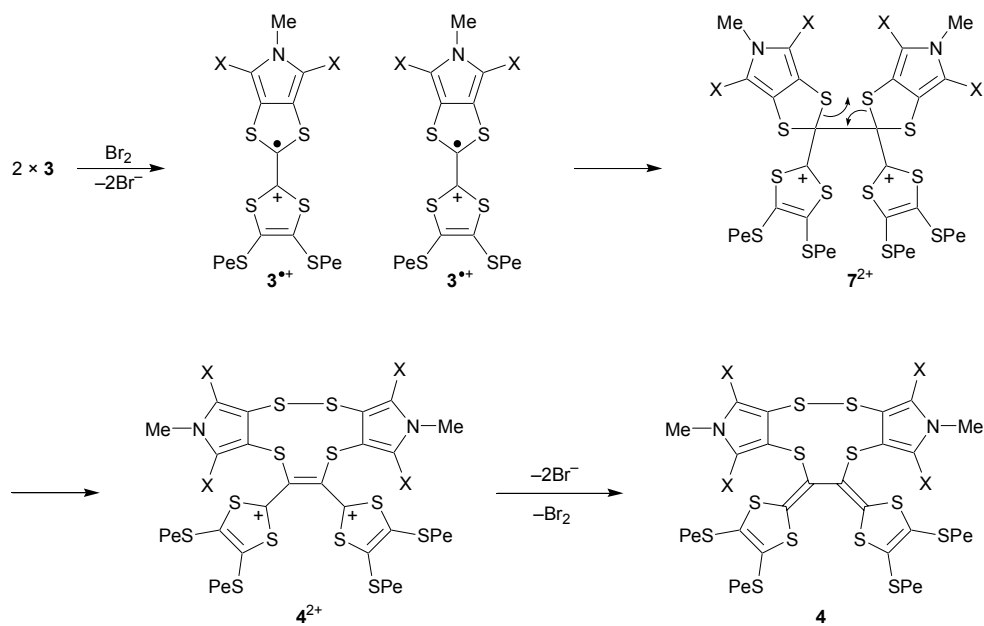

**Scheme S1.** Alternative mechanism for formation of the dimers **4**.

## Reference

J. O. Jeppesen, K. Takimiya, F. Jensen, T. Brimert, K. Nielsen, N. Thorup and J. Becher, *J. Org. Chem.*, 2000, **65**, 5794.
